# Supplementary material
Source: PubMed Central journal article supplement (PMC3026865)

## Supplemental Materials and Methods

### Additional Regions of Interest

The following regions of interest (ROIs) were identified as part of a distributed corticolimbic circuitry exhibiting robust main effects of task (i.e., faces > shapes) at a voxel level of  $p < .05$ , FDR corrected for multiple comparisons, and an extent threshold of at least 10 contiguous voxels: 1) orbitofrontal cortex (OFC; BA11); 2) bilateral ventrolateral prefrontal cortex (vlPFC; BA47); 3) bilateral hippocampal formation; and 4) right posterior fusiform gyrus. Consistent with prior research (Gianaros et al., 2009; Gianaros et al., 2008), task-related BOLD values were extracted from a 5mm radius sphere centered on the maximum voxel coordinates for vlPFC, vlPFC and posterior fusiform gyrus vlPFC and posterior fusiform gyrus ROIs using the VOI toolbox in SPM2. The region-specific maximum voxel coordinates were identified by applying anatomical ROI masks, derived from the WFU PickAtlas (Maldjian, Laurienti, & Burdette, 2004; Maldjian, Laurienti, Kraft, & Burdette, 2003), to the main effects of task contrast. For OFC, mean BOLD values for the entire functional cluster were extracted. For hippocampal formation, mean BOLD values were extracted from functional clusters within anatomical ROIs derived from the PickAtlas.

### References

- Gianaros, P. J., Hariri, A. R., Sheu, L. K., Muldoon, M. F., Sutton-Tyrrell, K., & Manuck, S. B. (2009). Preclinical atherosclerosis covaries with individual differences in reactivity and functional connectivity of the amygdala. *Biological Psychiatry* *65*, 943-950.
- Gianaros, P. J., Sheu, L. K., Matthews, K. A., Jennings, J. R., Manuck, S. B., & Hariri, A. R. (2008). Individual differences in stressor-evoked blood pressure reactivity vary with activation, volume, and functional connectivity of the amygdala. *Journal of Neuroscience* *28*, 990-999.
- Maldjian, J. A., Laurienti, P. J., & Burdette, J. H. (2004). Precentral gyrus discrepancy in electronic versions of the Talairach atlas. *Neuroimage*, *21*, 450-455.
- Maldjian, J. A., Laurienti, P. J., Kraft, R. A., & Burdette, J. H. (2003). An automated method for neuroanatomic and cytoarchitectonic atlas-based interrogation of fMRI data sets. *Neuroimage*, *19*, 1233-1239.

**Supplemental Figure 1:** Plot of individual participants' left dorsal amygdala reactivity values and latent trait anxiety scores. Participants' data points are color coded based on membership in the following groups: "low" social support ( 1 SD below the sample mean of social support), "mean" social support (between 1 SD below the sample mean and 1 SD above the sample mean) and "high" social support ( 1 SD above the sample mean). Note that all interaction regression analyses in this study were conducted using continuous social support scores. Individuals were never grouped in analyses but have been grouped here only for display purposes. AU=Arbitrary Units; SD=Standard Deviation.

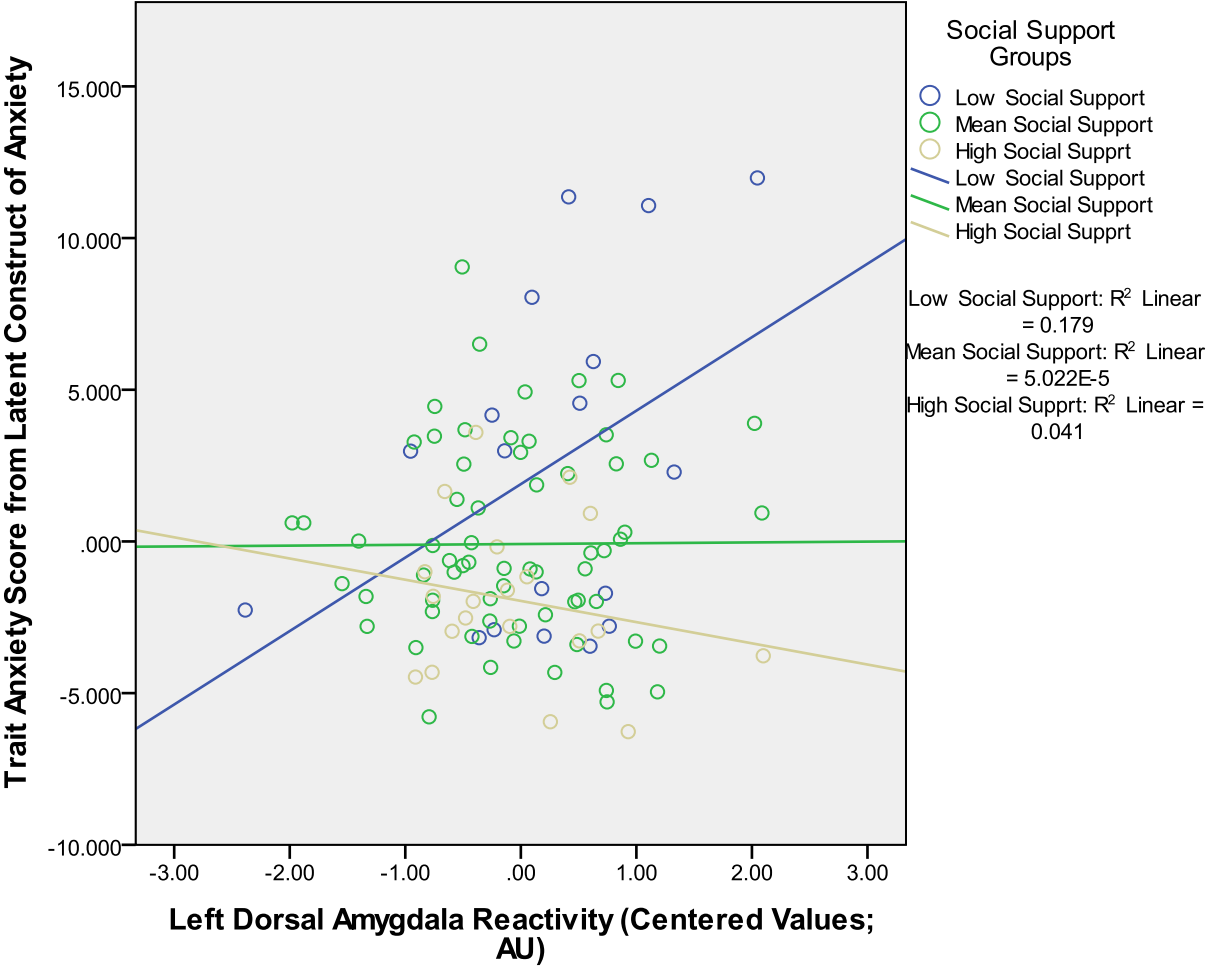

Supplement: NIHMS234268-supplement-new_supplamental_material_to_replace_previous_version.pdf [file NIHMS234268-supplement-new_supplamental_material_to_replace_previous_version.pdf]
